# Supplementary material for: High efficiency MAPbI3−xClx perovskite solar cell via interfacial passivation
Source: Royal Society of Chemistry journal article supplement (doi:10.1039/c8nr05504a), 2018-01-01
Supplement: c8nr05504a1.pdf [file c8nr05504a1.pdf]

Supporting Information

**High efficiency MAPbI<sub>3</sub>-xCl<sub>x</sub> perovskite solar cell via interfacial passivation**

By Sijian Yuan<sup>+</sup>, Jiao Wang<sup>+</sup>, Kunlong Yang<sup>+</sup>, Pengfei Wang<sup>+</sup>, Xin Zhang<sup>+</sup>, Yiqiang Zhan<sup>+\*</sup> and Lirong Zheng<sup>&\*</sup>

Sijian Yuan, Jiao Wang, Pengfei Wang, Xin Zhang, Prof. Yiqiang Zhan

State Key Laboratory of ASIC and System, SIST, Fudan University,  
200433, Shanghai, China

E-mail: yqzhan@fudan.edu.cn

Kunlong Yang, Prof. Lirong Zheng

Royal Inst Technol KTH, iPack VINN Excellence Ctr,  
S-16440, Stockholm, Sweden

E-mail: lrzheng@fudan.edu.cn

**Figure s1.** The XRD of perovskite fabricated on different thickness LiF.

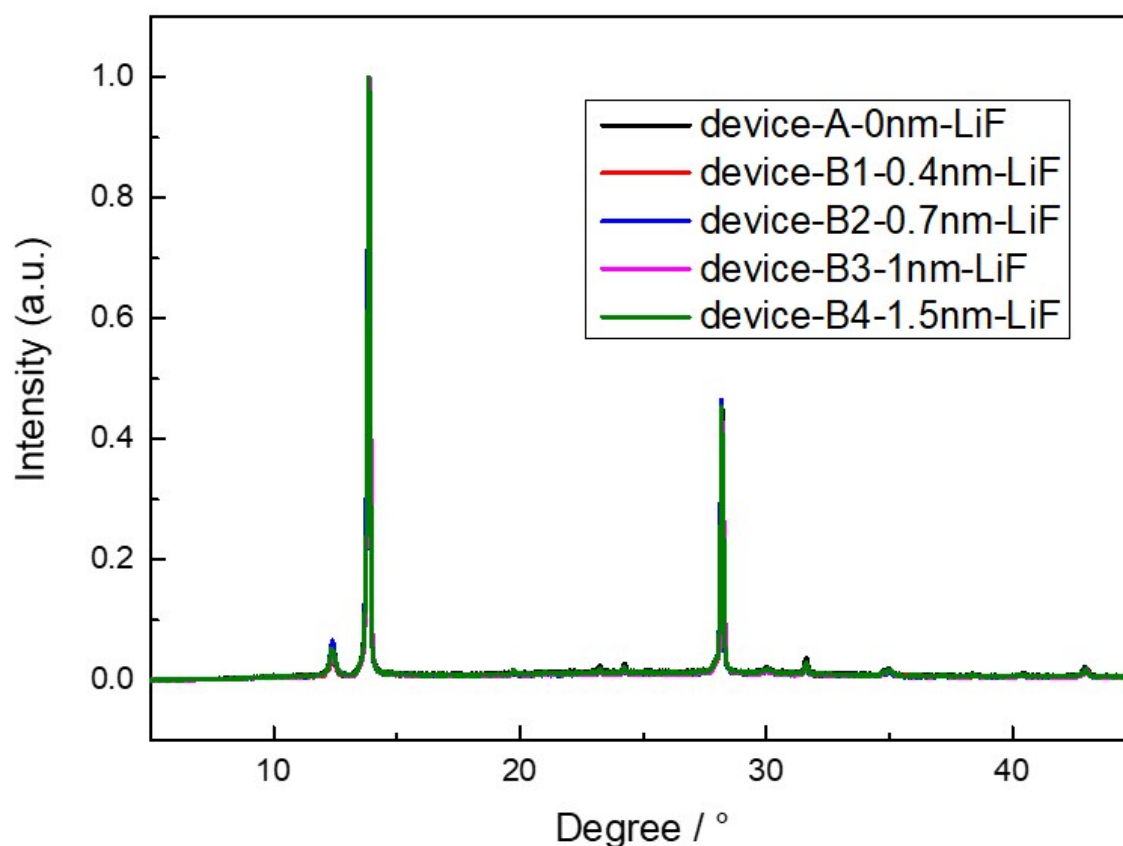

**Figure s2.** The PL lifetime of perovskite fabricated on different thickness LiF.

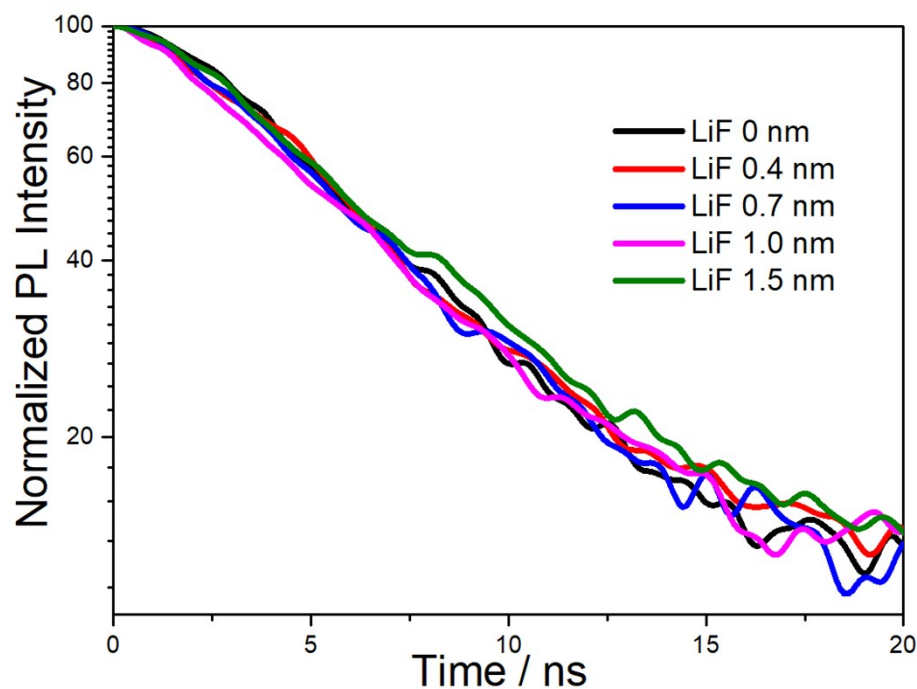

From the PL result, different devices show almost the same PL life time. It is well known that the PL life time are mainly determined by the perovskite bulk properties and the interfacial carrier transport. While the passivated the interfacial traps have small effect to the perovskite bulk properties, and also, it cannot enhance the interfacial carrier transport dramatically. So the PL life time shows few difference.

**Figure s3.** The IV of the LiTFSI device compared with 0.7 nm  $\text{PbF}_2$  and 0.7 nm LiF Devices.

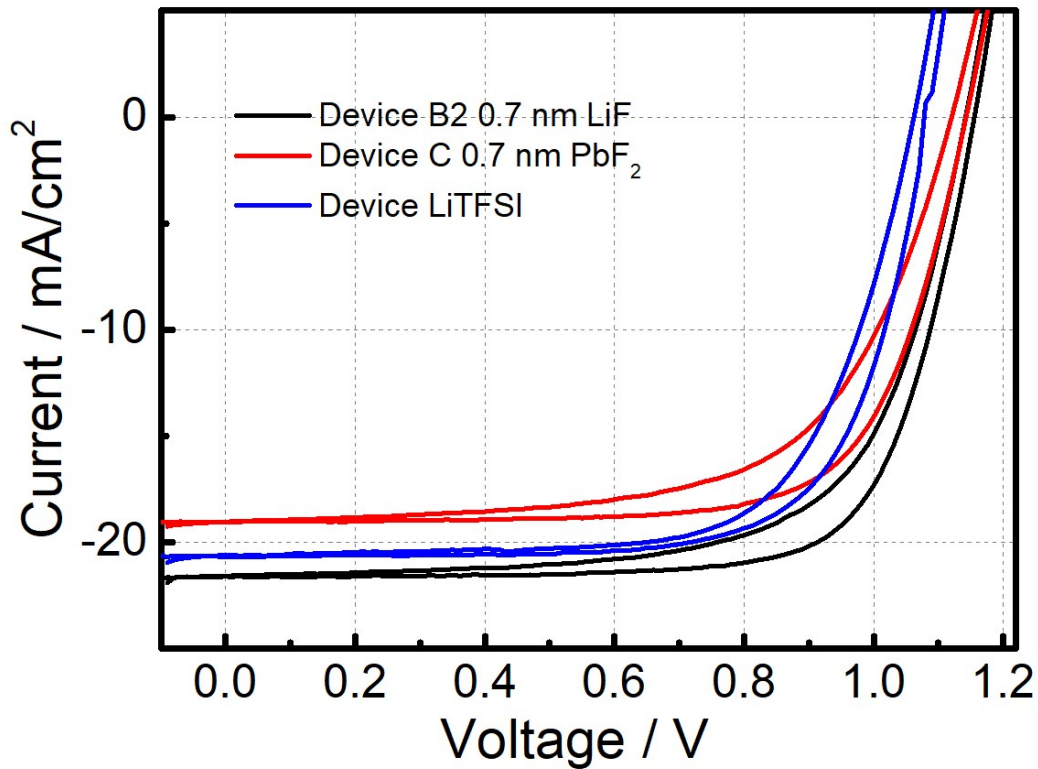

**Supplementary Table 1.** Performance of reported perovskite solar cells based on SnO<sub>2</sub> electronic transport layer.

|            | Voc<br>(V) | Jsc<br>(mA*cm <sup>-2</sup> ) | FF<br>(%) | Eff<br>(%) | Perovskite<br>types                                                                             | SnO <sub>2</sub> processing<br>temperature (°C) |
|------------|------------|-------------------------------|-----------|------------|-------------------------------------------------------------------------------------------------|-------------------------------------------------|
| 1          | 1.112      | 22.8                          | 75.78     | 19.21      | CH <sub>3</sub> NH <sub>3</sub> PbI <sub>3</sub>                                                | 200                                             |
| 2          | 1.147      | 22.03                         | 77.4      | 19.56      | Cs <sub>0.056</sub> FA <sub>0.76</sub> MA <sub>0.15</sub> PbI <sub>2.42</sub> Br <sub>0.4</sub> | 180                                             |
| 3          | 1.144      | 22.64                         | 74.0      | 19.17      | (FAPbI <sub>3</sub> ) <sub>0.875</sub> (CsPbBr <sub>3</sub> ) <sub>0.125</sub>                  | 250                                             |
| 4          | 1.023      | 21.19                         | 67.8      | 14.69      | CH <sub>3</sub> NH <sub>3</sub> PbI <sub>3</sub>                                                | 500                                             |
| 5          | 1.145      | 22.5                          | 73.9      | 19.05      | Cs <sub>0.056</sub> FA <sub>0.76</sub> MA <sub>0.15</sub> PbI <sub>2.42</sub> Br <sub>0.4</sub> | 180                                             |
| 6          | 1.07       | 22.8                          | 70        | 17.0       | (FAPbI <sub>3</sub> ) <sub>0.875</sub> (CsPbBr <sub>3</sub> ) <sub>0.125</sub>                  | 450                                             |
| 7          | 1.13       | 22.58                         | 78        | 19.8       | (FAPbI <sub>3</sub> ) <sub>0.85</sub> (MAPbBr <sub>3</sub> ) <sub>0.15</sub>                    | 250                                             |
| 8          | 1.06       | 21.4                          | 67        | 15.3       | CH <sub>3</sub> NH <sub>3</sub> PbI <sub>3</sub>                                                | Photonic Anneal                                 |
| 9          | 1.08       | 22.55                         | 71        | 17.29      | CH <sub>3</sub> NH <sub>3</sub> PbI <sub>3</sub>                                                | 95                                              |
| 10         | 1.04       | 21.2                          | 71.2      | 14.5       | CH <sub>3</sub> NH <sub>3</sub> PbI <sub>3</sub>                                                | 550                                             |
| 11         | 1.10       | 22.03                         | 74.6      | 18.77      | CH <sub>3</sub> NH <sub>3</sub> PbI <sub>3</sub>                                                | 250                                             |
| 12         | 1.06       | 21.94                         | 61.73     | 14.36      | CH <sub>3</sub> NH <sub>3</sub> PbI <sub>3-x</sub> Cl <sub>x</sub>                              | 180                                             |
| 13         | 1.12       | 22.43                         | 79.62     | 20.42      | CH <sub>3</sub> NH <sub>3</sub> PbI <sub>3</sub>                                                | 150                                             |
| 14         | 1.03       | 22.31                         | 79        | 18.16      | CH <sub>3</sub> NH <sub>3</sub> PbI <sub>3</sub>                                                | 450                                             |
| 15         | 1.19       | 22.2                          | 78.7      | 20.8       | (FAPbI <sub>3</sub> ) <sub>0.875</sub> (MAPbBr <sub>3</sub> ) <sub>0.125</sub>                  | 180                                             |
| <b>Our</b> | 1.16       | 21.7                          | 73.1      | 18.3       | CH <sub>3</sub> NH <sub>3</sub> PbI <sub>3</sub>                                                |                                                 |

## References

- (1) Xiong, L.; Qin, M.; Chen, C.; Wen, J.; Yang, G.; Guo, Y.; Ma, J.; Zhang, Q.; Qin, P.; Li, S. Fully High-Temperature-Processed SnO<sub>2</sub> as Blocking Layer and Scaffold for Efficient, Stable, and Hysteresis-Free Mesoporous Perovskite Solar Cells. *Adv Funct Mater* **2018**, *28* (10), 1706276.
- (2) Yu, H.; Yeom, H. I.; Lee, J. W.; Lee, K.; Hwang, D.; Yun, J.; Ryu, J.; Lee, J.; Bae, S.; Kim, S. K. Superfast Room-Temperature Activation of SnO<sub>2</sub> Thin Films via Atmospheric Plasma Oxidation and Their Application in Planar Perovskite Photovoltaics. *Adv Mater* **2018**, *30* (10), 1704852.
- (3) Jung, K. H.; Seo, J. Y.; Lee, S.; Shin, H.; Park, N. G. Solution-Processed SnO<sub>2</sub> Thin Film for a Hysteresis-Free Planar Perovskite Solar Cell with a Power Conversion Efficiency of 19.2%. *J Mater Chem A* **2017**, *5*, 24790.
- (4) Rao, H.; Chen, B.; Li, W.; Xu, Y.; Chen, H.; Kuang, D.; Su, C. Improving the Extraction of Photogenerated Electrons with SnO<sub>2</sub> Nanocolloids for Efficient Planar Perovskite Solar Cells. *Adv Funct Mater* **2016**, *25* (46), 7200–7207.
- (5) Yang, G.; Chen, C.; Yao, F.; Chen, Z.; Zhang, Q.; Zheng, X.; Ma, J.; Lei, H.; Qin, P.; Xiong, L. Effective Carrier-Concentration Tuning of SnO<sub>2</sub> Quantum Dot Electron-Selective Layers for High-Performance Planar Perovskite Solar Cells. *Adv Mater* **2018**, *30* (14), 1706023.
- (6) Roose, B.; Johansen, C. M.; Dupraz, K.; Jaouen, T.; Aebi, P.; Steiner, U.; Abate, A. Ga-Doped SnO<sub>2</sub> Mesoporous Contact for UV Stable Highly Efficient Perovskite Solar Cells. *J Mater Chem A* **2017**, *6*, 1850.
- (7) Lee, Y.; Paek, S.; Cho, K. T.; Oveisi, E.; Gao, P.; Lee, S.; Park, J. S.; Zhang, Y.; Humphry-Baker, R.; Asiri, A. M. Enhanced Charge Collection with Passivation of the Tin Oxide Layer in Planar Perovskite Solar Cells. *J Mater Chem A* **2017**, *5*, 12729.
- (8) Zhu, M.; Liu, W.; Ke, W.; Clark, S.; Secor, E. B.; Song, T. Bin; Kanatzidis, M. G.; Li, X.; Hersam, M. C. Millisecond-Pulsed Photonically-Annealed Tin Oxide Electron Transport Layers for Efficient Perovskite

Solar Cells. *J Mater Chem A* **2017**, *5* (46), 24110.

- (9) Zuo, L.; Chen, Q.; De, M. N.; Hsieh, Y. T.; Chen, H.; Sun, P.; Chang, S. Y.; Zhao, H.; Dong, S.; Yang, Y. Tailoring the Interfacial Chemical Interaction for High-Efficiency Perovskite Solar Cells. *Nano Lett* **2016**, *17* (1), 269.
- (10) Huang, L.; Sun, X.; Li, C.; Xu, J.; Xu, R.; Du, Y.; Ni, J.; Cai, H.; Li, J.; Hu, Z. UV-Sintered Low-Temperature Solution-Processed SnO<sub>2</sub> as Robust Electron Transport Layer for Efficient Planar Heterojunction Perovskite Solar Cells. *ACS Appl Mater Interfaces* **2017**, *9*, 21909.
- (11) Yang, G.; Lei, H.; Hong, T.; Zheng, X.; Ma, J.; Qin, L.; Ke, W.; Chen, Z.; Xiong, L.; Qin, P. Reducing Hysteresis and Enhancing Performance of Perovskite Solar Cells Using Low-Temperature Processed Y-Doped SnO<sub>2</sub> Nanosheets as Electron Selective Layers. *Small* **2017**, *13* (2), 201601769.
- (12) Xiong, L.; Qin, M.; Yang, G.; Guo, Y.; Lei, H.; Liu, Q.; Ke, W.; Tao, H.; Qin, P.; Li, S. Performance Enhancement of High Temperature SnO<sub>2</sub>-Based Planar Perovskite Solar Cells: Electrical Characterization and Mechanism Understanding. *J Mater Chem A* **2016**, *4* (21), 8374.
- (13) Wang, C.; Xiao, C.; Yu, Y.; Zhao, D.; Awni, R. A.; Grice, C. R.; Ghimire, K.; Constantinou, I.; Liao, W.; Cimaroli, A. J. Understanding and Eliminating Hysteresis for Highly Efficient Planar Perovskite Solar Cells. *Adv Energy Mater* **2017**, *7*, 1700414.
- (14) Dong, Q.; Wang, M.; Zhang, Q.; Chen, F.; Zhang, S.; Bian, J.; Ma, T.; Wang, L.; Shi, Y. Discontinuous SnO<sub>2</sub> Derived Blended-Interfacial-Layer in Mesoscopic Perovskite Solar Cells: Minimizing Electron Transfer Resistance and Improving Stability. *Nano Energy* **2017**, *38*, 358.
- (15) Anaraki, E. H.; Kermanpur, A.; Steier, L.; Domanski, K.; Matsui, T.; Tress, W.; Saliba, M.; Abate, A.; Grätzel, M.; Hagfeldt, A. Highly Efficient and Stable Planar Perovskite Solar Cells by Solution-Processed Tin Oxide. *Energy Environ Sci* **2016**, *9* (10), 3128.
